# Supplementary material
Source: PubMed Central journal article supplement (PMC8179842)

# Supplementary Figure S1

## Pre-Rx versus D28

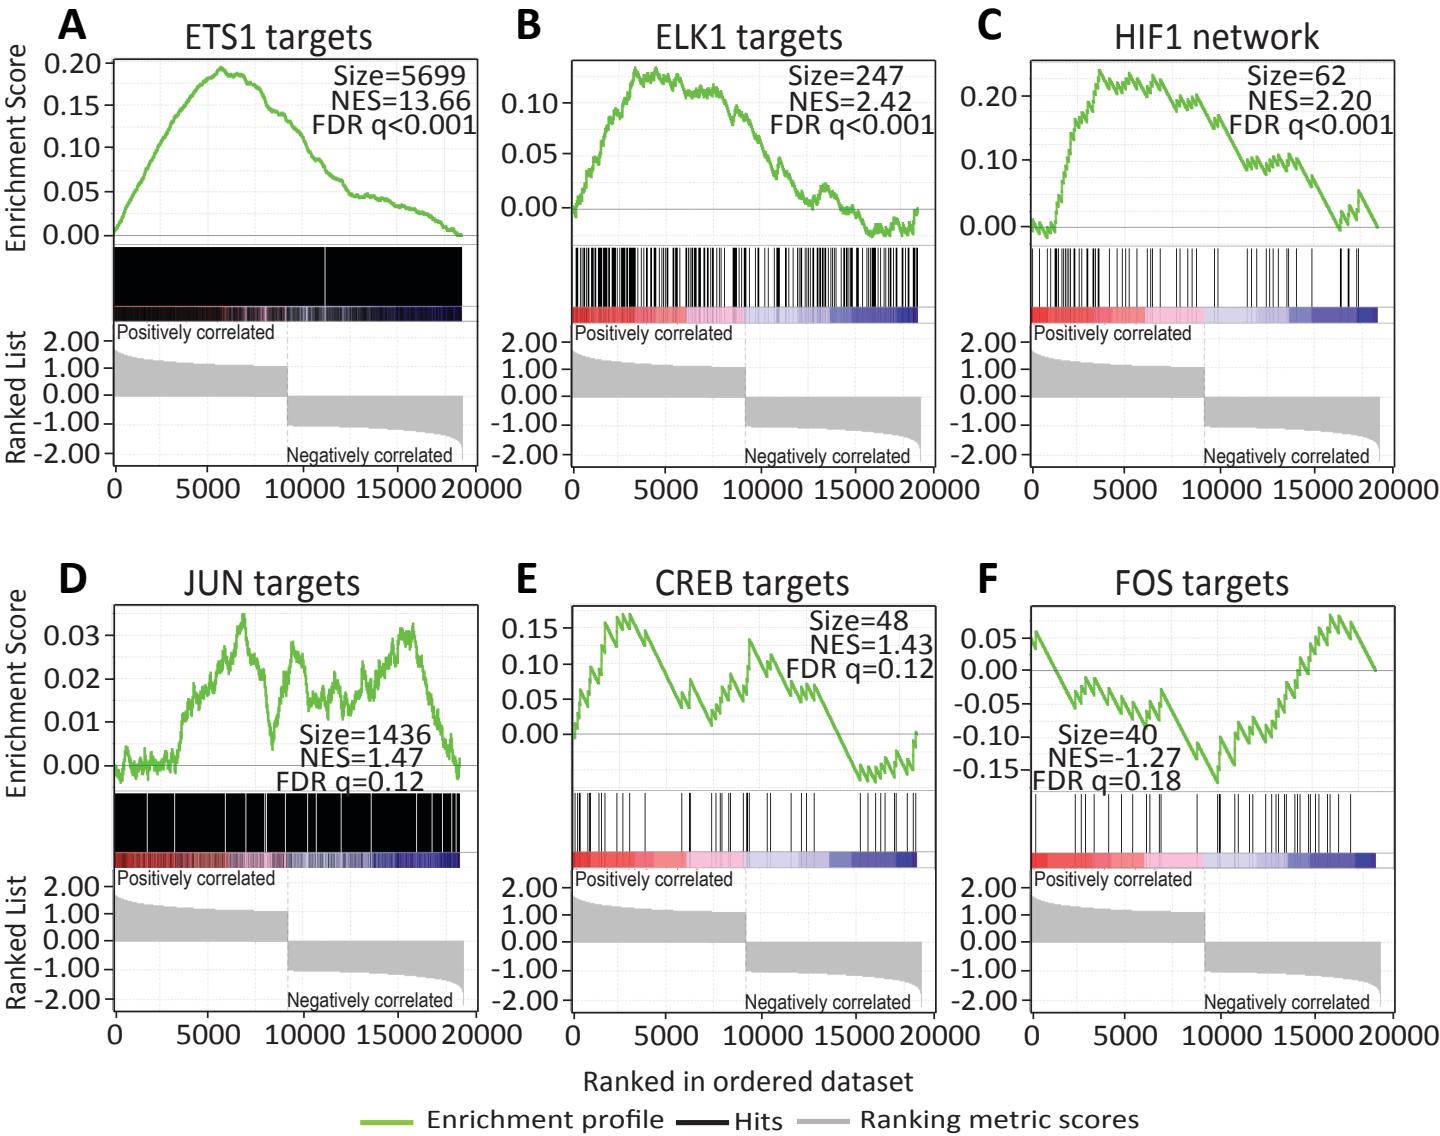

## Supplementary Figure S2

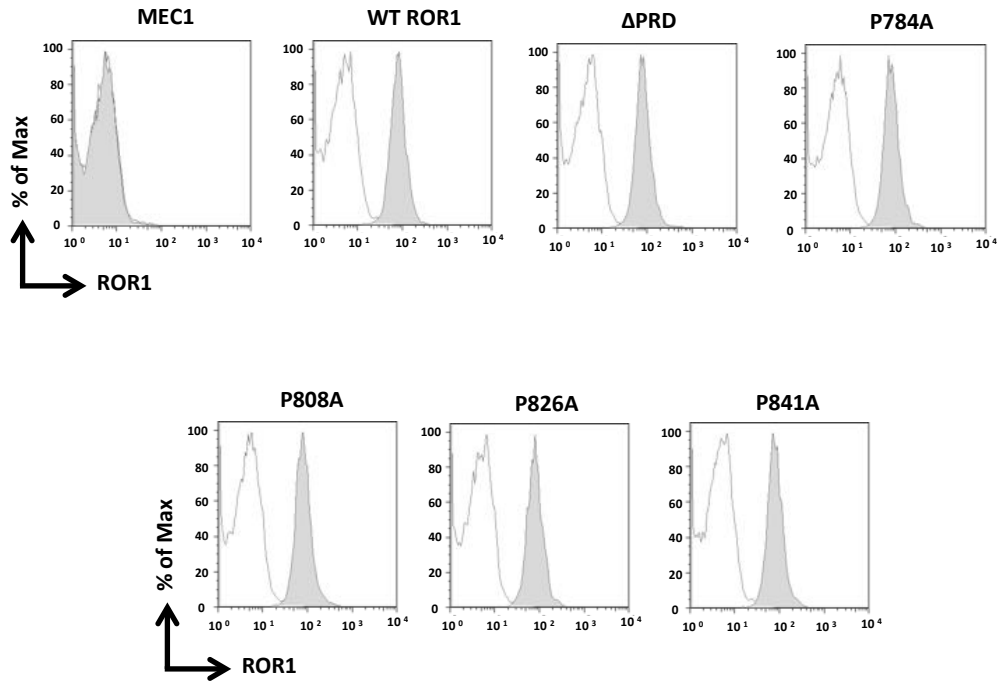

## Supplementary Figure S3

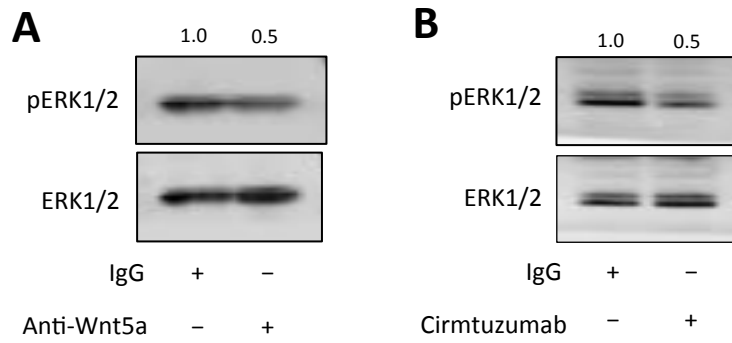

## Supplementary Figure S4

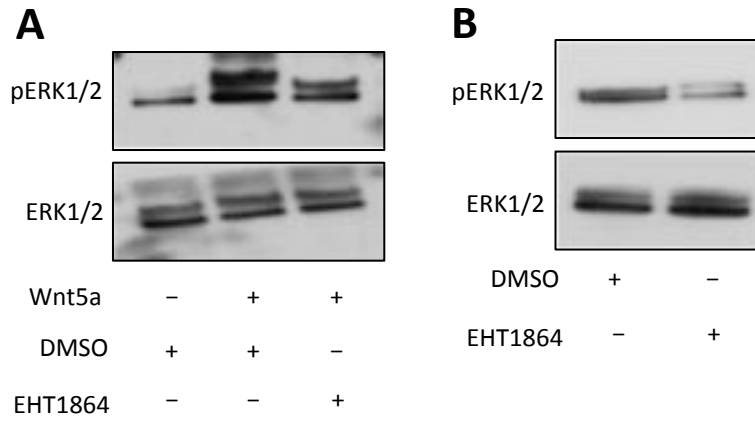

## Supplementary Figure S5

DOCK2 tyrosine phosphorylation: DLIGKNV**Y**(985)PGDWMAMSMVQNR

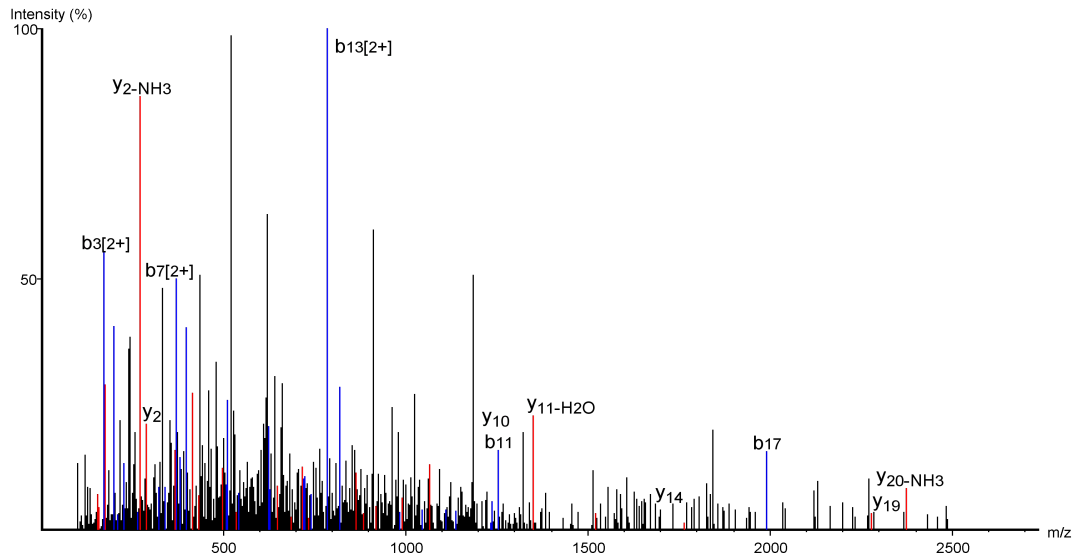

## Supplementary Figure S6

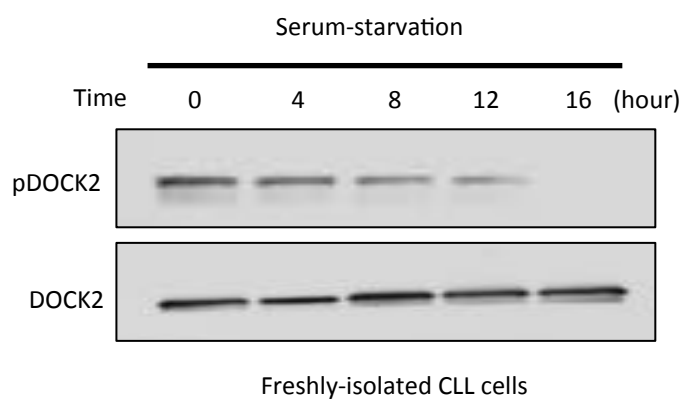

## Supplementary Figure S7

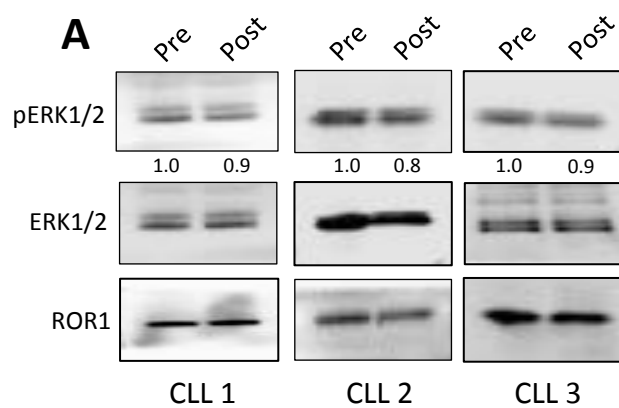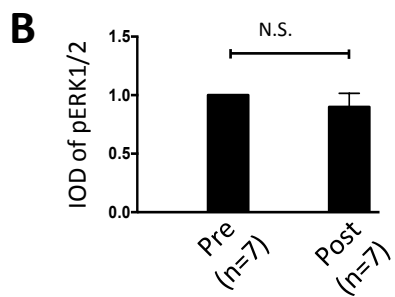

Supplement: 41375_2020_1055_MOESM2_ESM.pdf [file 41375_2020_1055_MOESM2_ESM.pdf]
